# Supplementary material for: Nutritional Imbalances in Adult Celiac Patients Following a Gluten-Free Diet
Source: MDPI journal article supplement (doi:10.3390/nu13082877), 2021-08-21
Supplement: s1 [file s1]

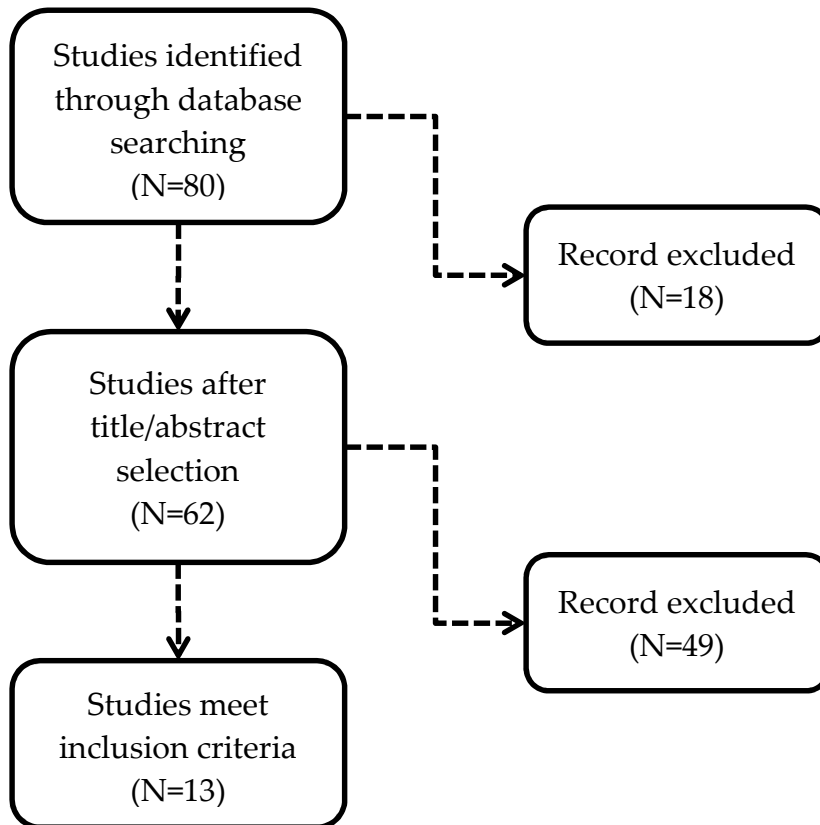

Supplementary Figure S1. Schema of how articles related to “nutritional deficiencies among adults with celiac disease following a GFD” were selected.
